# Supplementary material for: Factors Associated With Mental Health Outcomes Among Health Care Workers Exposed to Coronavirus Disease 2019
Source: PubMed Central journal article supplement (PMC7090843; doi:10.1001/jamanetworkopen.2020.3976), 2020-03-23
Supplement: jamanetwopen-3-e203976-s001.pdf [file jamanetwopen-3-e203976-s001.pdf]

## Supplementary Online Content

Lai J, Ma S, Wang Y, et al. Factors associated with mental health outcomes among health care workers exposed to coronavirus disease 2019. *JAMA Netw Open*. 2020;3(3):e203976.  
doi:10.1001/jamanetworkopen.2020.3976

**eFigure.** Milestone Events During the Outbreak and Epidemic of COVID-19

**eTable 1.** Occupation and Geographic Data of Nonrespondents

**eTable 2.** Intergroup Comparisons of Regional Differences on Scores of Depression, Anxiety, Insomnia, and Distress

**eTable 3.** Factor Scores of IES-R in Total Participants and Subgroups

**eTable 4.** Hospital Type and Factor Scores of IES-R in Front-line Workers

**eTable 5.** Intergroup Comparisons of Regional Differences on Factor Scores of IES-R

This supplementary material has been provided by the authors to give readers additional information about their work.

**eFigure.** Milestone Events during the Outbreak and Epidemic of COVID-19<sup>a</sup>

<sup>a</sup> From December 31, 2019 to January 31, 2020, the confirmed case of COVID-19 increased dramatically from 27 to over 10,000. This study was conducted from January 29 to February 3, 2020, as indicated in the figure.

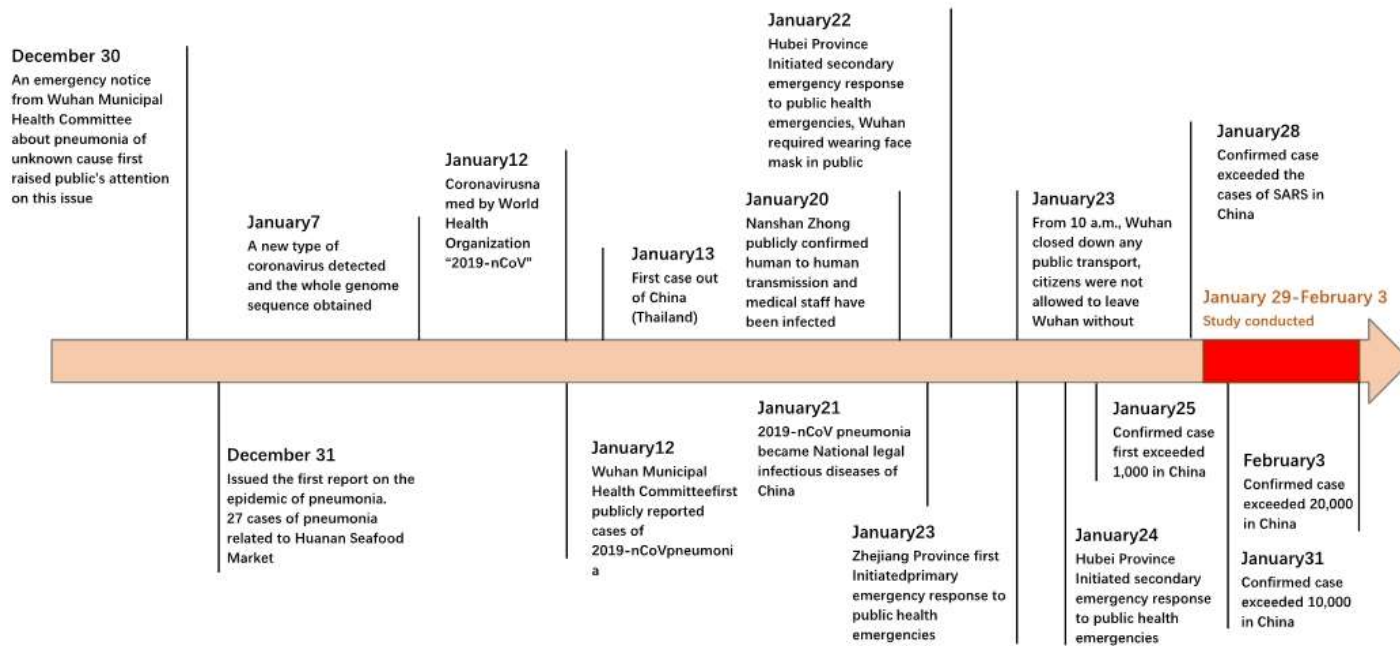

**eTable 1.** Occupation and Geographic Data of Nonrespondents

| Total <sup>a</sup> | Occupation |           |           | Geographic location              |                        |           |
|--------------------|------------|-----------|-----------|----------------------------------|------------------------|-----------|
|                    | Physician  | Nurse     | Wuhan     | Hubei Province outside of Wuhan) | Outside Hubei Province |           |
| No, (%)            | 573        | 209(36.5) | 364(63.5) | 349(60.9)                        | 111(19.4)              | 113(19.7) |

<sup>a</sup> Among the 1830 individuals asked to participate, 573 (31.3%) did not respond to the survey.

**eTable 2.** Intergroup Comparisons of Regional Differences on Scores of Symptoms of Depression, Anxiety, Insomnia, and Distress

| Scale               | Geographic location |                                 |                        | <i>P1</i> <sup>a</sup> | <i>P2</i> <sup>b</sup> | <i>P3</i> <sup>c</sup> |
|---------------------|---------------------|---------------------------------|------------------------|------------------------|------------------------|------------------------|
|                     | Wuhan               | Hubei Province outside of Wuhan | Outside Hubei Province |                        |                        |                        |
| PHQ-9, median (IQR) | 5.0(2.0, 8.0)       | 4.0(1.0, 7.0)                   | 3.0(0.0, 7.0)          | .42                    | .02                    | < .001                 |
| GAD-7, median (IQR) | 4.0(1.0, 7.0)       | 3.0(0.0, 6.0)                   | 2.0(0.0, 6.0)          | .40                    | .01                    | < .001                 |
| ISI, median (IQR)   | 5.0(2.0, 10.0)      | 4.0(1.0, 8.0)                   | 3.0(1.0, 8.0)          | .65                    | .02                    | < .001                 |
| IES-R, median (IQR) | 21.0(8.5, 34.5)     | 18.0(6.0, 28.0)                 | 15.0(4.0, 26.0)        | .34                    | .007                   | < .001                 |

Abbreviation: PHQ-9, 9-item Patient Health Questionnaire; GAD-7, 7-item Generalized Anxiety Disorder; ISI, 7-item Insomnia Severity Index; IES-R, 22-item Impact of Event Scale-Revised; IQR, interquartile range.

<sup>a</sup> Outside Hubei Province vs Hubei Province outside of Wuhan.

<sup>b</sup> Wuhan vs Hubei Province outside of Wuhan.

<sup>c</sup> Wuhan v. Outside Hubei Province.

**eTable 3.** Factor Scores of IES-R in Total Participants and Subgroups

| Factor                     | Total score    | Occupation     |                | P value | Sex            |                | P value | Working position |                | P value | Type of hospital |                | P value |
|----------------------------|----------------|----------------|----------------|---------|----------------|----------------|---------|------------------|----------------|---------|------------------|----------------|---------|
|                            |                | Physician      | Nurse          |         | Male           | Female         |         | Front-line       | Second-line    |         | Tertiary         | Secondary      |         |
| Avoidance, median (IQR)    | 6.0(2.0, 11.0) | 6.0(1.0, 10.0) | 6.0(2.0, 12.0) | .02     | 5.0(0.0, 10.0) | 7.0(2.0, 11.0) | <.001   | 7.0(2.0, 12.0)   | 5.0(1.0, 10.0) | <.001   | 6.0(2.0, 11.0)   | 6.0(1.0, 11.0) | .35     |
| Intrusion, median (IQR)    | 8.0(3.0, 13.0) | 7.0(2.0, 13.0) | 8.0(4.0, 13.0) | .006    | 6.0(2.0, 11.0) | 8.0(4.0, 13.0) | <.001   | 9.0(4.0, 14.0)   | 7.0(3.0, 11.0) | <.001   | 8.0(4.0, 13.0)   | 8.0(3.0, 13.0) | .47     |
| Hyperarousal, median (IQR) | 5.0(1.0, 8.0)  | 4.0(1.0, 8.0)  | 5.0(1.5, 9.0)  | .02     | 3.0(0.0, 8.0)  | 5.0(2.0, 9.0)  | <.001   | 6.0(2.0, 9.0)    | 4.0(1.0, 8.0)  | <.001   | 5.0(1.0, 8.0)    | 5.0(1.0, 9.0)  | .19     |

Abbreviation: IES-R, 22-item Impact of Event Scale-Revised; IQR, interquartile range.

**eTable 4.** Hospital Type and Factor Scores of IES-R in Front-line Workers

| Factor                     | First-line workers |                    |                |
|----------------------------|--------------------|--------------------|----------------|
|                            | Tertiary hospital  | Secondary hospital | <i>P</i> value |
| Avoidance, median (IQR)    | 8.0(2.0, 13.0)     | 6.0(2.0, 11.0)     | .06            |
| Intrusion, median (IQR)    | 9.0(4.0, 15.0)     | 8.0(4.0, 13.0)     | .15            |
| Hyperarousal, median (IQR) | 6.0(2.0, 10.0)     | 6.0(2.0, 9.0)      | .29            |

Abbreviation: IES-R, 22-item Impact of Event Scale-Revised; IQR, interquartile range.

**eTable 5.** Intergroup Comparisons of Regional Differences on Factor Scores of IES-R

| Scale                      | Geographic location |                                     |                        | <i>P1</i> <sup>a</sup> | <i>P2</i> <sup>b</sup> | <i>P3</i> <sup>c</sup> |
|----------------------------|---------------------|-------------------------------------|------------------------|------------------------|------------------------|------------------------|
|                            | Wuhan               | Hubei Province outside of<br>Wuhan) | Outside Hubei Province |                        |                        |                        |
| Avoidance, median (IQR)    | 7.0(2.0, 12.0)      | 5.0(2.0, 10.0)                      | 4.0(1.0, 9.0)          | .47                    | .01                    | <.001                  |
| Intrusion, median (IQR)    | 8.0(4.0, 14.0)      | 7.0(3.0, 11.0)                      | 6.0(2.0, 11.0)         | .93                    | .001                   | <.001                  |
| Hyperarousal, median (IQR) | 5.0(2.0, 9.0)       | 5.0(1.0, 8.0)                       | 3.0(0.0, 7.0)          | .06                    | .19                    | <.001                  |

Abbreviation: IES-R, 22-item Impact of Event Scale-Revised; IQR, interquartile range.

<sup>a</sup> Outside Hubei Province vs Hubei Province outside Wuhan.

<sup>b</sup> Wuhan vs Hubei Province outside ofWuhan.

<sup>c</sup> Wuhan vs Outside Hubei Province.
